# Supplementary material
Source: Springer Nature journal article supplement (https://www.springermedizin.de/resource/supplementary/12955_2012_1085_MOESM2_ESM.pdf/9559256)

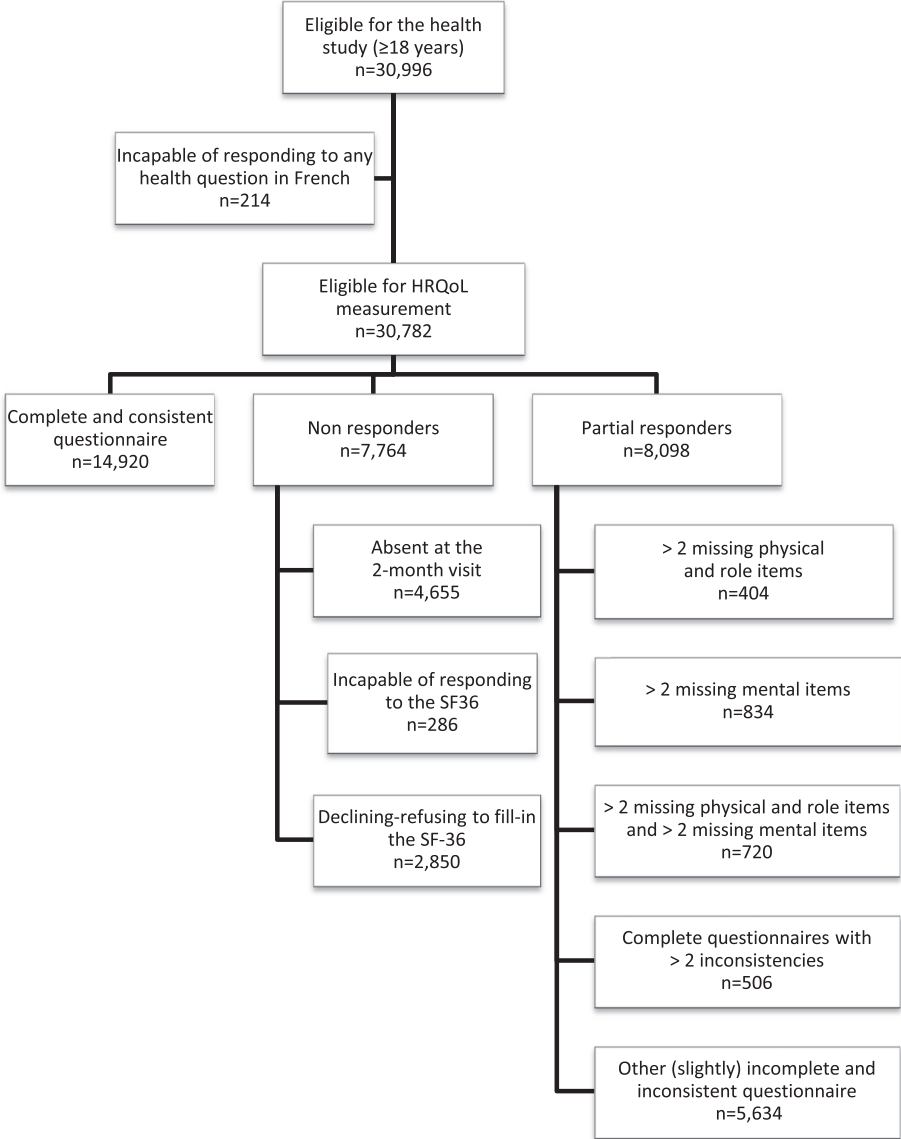

Supplement: MOESM2 [file 9559256]
